# Supplementary material for: Pioneering dielectric materials of Sn-doped Nb0.025Ti0.975O2 ceramics with excellent temperature and humidity stability for advanced ceramic capacitors
Source: PubMed Central journal article supplement — RSC Adv. 2024 Mar 4;14(11):7631–9. doi: 10.1039/d3ra08336e (PMC10910855; doi:10.1039/d3ra08336e), 2024-03-04
Supplement: RA-014-D3RA08336E-s001.pdf [file RA-014-D3RA08336E-s001.pdf]

## Supplementary Information

Pioneering dielectric materials of Sn-doped  $\text{Nb}_{0.025}\text{Ti}_{0.975}\text{O}_2$   
ceramics with excellent temperature and humidity stability for  
advanced ceramic capacitors

Yasumin Mingmuang<sup>1</sup>, Narong Chanlek<sup>2</sup>, Masaki Takesada<sup>3,\*</sup>, Ekaphan Swatsitang<sup>1</sup>,  
& Prasit Thongbai<sup>1,\*</sup>

<sup>1</sup> *Giant Dielectric and Computational Design Research Group (GD-CDR), Department of Physics, Faculty of Science, Khon Kaen University, Khon Kaen 40002, Thailand*

<sup>2</sup> *Synchrotron Light Research Institute (Public Organization), 111 University Avenue, Muang District, Nakhon Ratchasima 30000, Thailand*

<sup>3</sup> *Department of Physics, Hokkaido University, Sapporo, 060-0810, Japan*

\*E-mail address: [pthongbai@kku.ac.th](mailto:pthongbai@kku.ac.th) (P. Thongbai); [mt@phys.sci.hokudai.ac.jp](mailto:mt@phys.sci.hokudai.ac.jp) (M. Takesada)

**Table 1** Lattice parameters, Raman shifts of  $E_g$  and  $A_{1g}$  modes, and bond lengths for 1%Sn–NTO, 2.5%Sn–NTO, and 5%Sn–NTO ceramics.

| Sample condition                                                 | 1%Sn–NTO                         | 2.5%Sn–NTO | 5%Sn–NTO |
|------------------------------------------------------------------|----------------------------------|------------|----------|
| $a = b$ (Å)                                                      | 4.605(9)                         | 4.608(7)   | 4.611(9) |
| $c$ (Å)                                                          | 2.965(6)                         | 2.969(2)   | 2.973(9) |
| $E_g$ (cm <sup>-1</sup> )                                        | 438.7                            | 438.0      | 436.5    |
| $A_{1g}$ (cm <sup>-1</sup> )                                     | 606.1                            | 606.6      | 607.2    |
| Bond length (Å)                                                  | $\mathbf{A} = \text{Ta, Sn, Ti}$ |            |          |
| $\mathbf{A}_{(0,0,0)}-\mathbf{O}_{(0.19480, -0.19480, 0.50000)}$ | 1.952(0)                         | 1.953(0)   | 1.956(0) |
| $\mathbf{A}_{(0,0,0)}-\mathbf{O}_{(0.30520, 0.30520, 0.00000)}$  | 1.988(0)                         | 1.989(0)   | 1.991(0) |
| $\mathbf{A}_{(0,0,0)}-\mathbf{O}_{(0.30520, -0.69480, 0.00000)}$ | 3.495(1)                         | 3.497(1)   | 3.500(1) |
| $\mathbf{A}_{(0,0,0)}-\mathbf{A}_{(0, 0, 1)}$                    | 2.966(1)                         | 2.969(1)   | 2.974(1) |

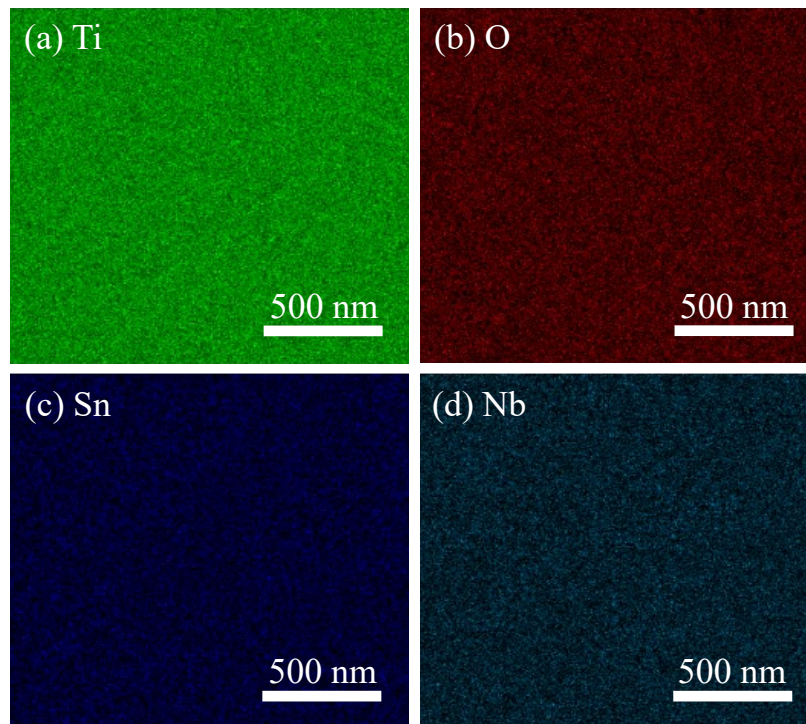

**Fig. S1** SEM mapping of (a) Ti, (b) O, (c) Sn, and (d) Nb for 5%Sn–NTO ceramic.

Fig. S1 presents mapping images of all elements in 5%Sn–NTO ceramic sintered at 1200 °C for 3h. Generally, a second phase was observed in specific regions, such as grain boundaries, which were indicated by lighter areas in the elemental mapping. Notably, a homogeneous distribution of Sn, Nb, Ti, and O elements was detected along both grains and grain boundaries on the surface morphology of the 5% Sn–NTO ceramic. There was no accumulation of several phases in specific regions, indicating the absence of secondary phases. The result is similar to other works in co-doped rutile TiO<sub>2</sub> ceramics [1, 2].

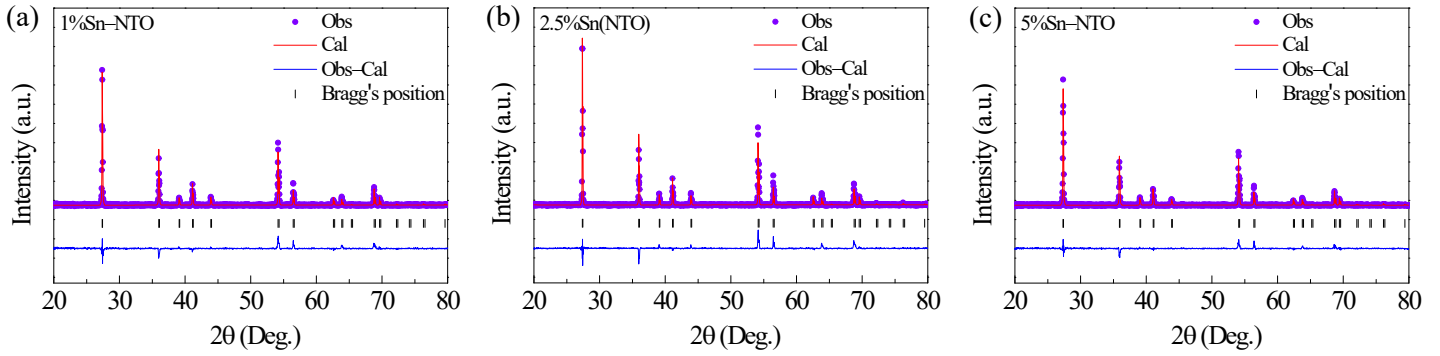

**Fig. S2** Rietveld profile fitting for (a) 1%Sn-NTO, (b) 2.5%Sn-NTO, and (c) 5%Sn-NTO ceramics.

Fig. S2 illustrates the Rietveld refinement fitting for the 1%Sn-NTO, 2.5% Sn-NTO and 5% Sn-NTO ceramics, respectively, using X'pert High Score Plus program. A rutile  $\text{TiO}_2$  phase was observed in all samples. Lattice parameters ( $a$  and  $c$ ) and bond lengths ( $\text{A-O}$  and  $\text{A-A}$ , where  $\text{A} = \text{Ta}$ ,  $\text{Sn}$ ,  $\text{Ti}$ ) were calculated and summarized in Table 1. These values increased with higher  $\text{Sn}^{4+}$  concentrations. The results were attributed to the effect of  $\text{Nb}^{5+}$  and  $\text{Sn}^{4+}$  radii, where  $r_6(\text{Nb}^{4+}) = 64.0$  pm and  $r_6(\text{Sn}^{4+}) = 69.0$  pm, which are larger than the  $\text{Ti}^{4+}$  host ions ( $r_6(\text{Ti}^{4+}) = 60.5$  pm) by approximately 5.8% and 14.0%, respectively [2, 3]. The variance in dopant radii is associated with the expansion of lattice parameters and bond lengths, influenced by the presence of  $\text{Sn}^{4+}$  ions. Importantly, the absence of a second phase in the 1–5%Sn-NTO ceramics indicated that both dopants completely replaced  $\text{Ti}^{4+}$  sites [2].

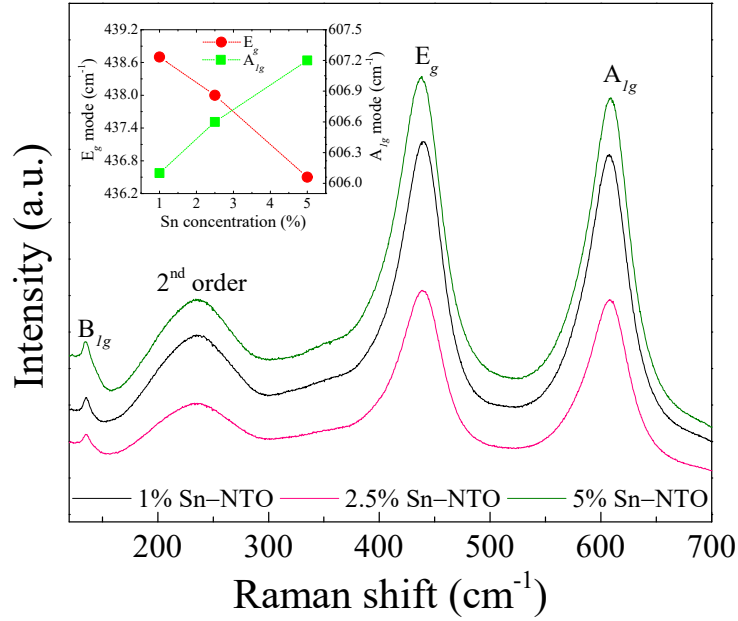

**Fig. S3** Raman spectra of Sn–NTO ceramics sintered at 1200 °C for 3h. The inset shows Raman shift of E<sub>g</sub> and A<sub>1g</sub> modes of Sn–NTO ceramics as a function of Sn<sup>4+</sup> concentrations.

Fig. S3 shows Raman peaks of rutile TiO<sub>2</sub> include B<sub>1g</sub>, E<sub>g</sub> and A<sub>1g</sub> modes, as well as the multi-phonon peak of a second-order (2<sup>nd</sup> order) effect for Sn–NTO ceramics [4, 5]. In the inset of Fig. S3, the Raman peaks of E<sub>g</sub> were revealed to shift toward the low energy side in the range from 439 to 437 cm<sup>-1</sup> with increasing Sn<sup>4+</sup> concentrations. The result can be attributed to the lattice distortion and the movement of oxygen along c-axis [4]. In contrast, the A<sub>1g</sub> mode exhibited a slight shift to higher frequency side from 601 to 607 cm<sup>-1</sup> with increasing Sn<sup>4+</sup> concentrations, as a result of the influence of the Ti–O stretch modes [6]. Both E<sub>g</sub> and A<sub>1g</sub> peak shift values were determined using the Lorentz model, as listed in Table 1.

## Reference

- [1] M. Zhong, J. Li, J. Shao, Y. Cao, K. Li, W. Zhao, An investigation into the enhanced permittivity properties of Zr co-doped  $(\text{Ga}_{0.5}\text{Nb}_{0.5})_{0.03}\text{Ti}_{0.97}\text{O}_2$  ceramics, *Ceramics International*, 45 (2019) 14983-14990.
- [2] J. Fan, T. Yang, Z. Cao, Colossal permittivity and multiple effects in (Zn + Ta) codoped  $\text{TiO}_2$  ceramics, *Journal of Asian Ceramic Societies*, 8 (2020) 1188-1196.
- [3] J. Fan, Y. Chen, Z. Long, L. Tong, G. He, Z. Hu, Giant dielectric response and relaxation behavior in (Tm + Ta) co-doped  $\text{TiO}_2$  ceramics, *Phys Chem Chem Phys*, 24 (2022) 4759-4768.
- [4] G. Liu, H. Fan, J. Xu, Z. Liu, Y. Zhao, Colossal permittivity and impedance analysis of niobium and aluminum co-doped  $\text{TiO}_2$  ceramics, *RSC Advances*, 6 (2016) 48708-48714.
- [5] J. Fan, Z. Long, Z. Hu, High dielectric performance and multifarious polarizations in (Lu + Ta) co-doped  $\text{TiO}_2$  ceramics, *Journal of Asian Ceramic Societies*, 9 (2021) 1255-1264.
- [6] W. Tuichai, S. Danwittayakul, J. Manyam, N. Chanlek, M. Takesada, P. Thongbai, Giant dielectric properties of  $\text{Ga}^{3+}\text{-Nb}^{5+}\text{Co}$ -doped  $\text{TiO}_2$  ceramics driven by the internal barrier layer capacitor effect, *Materialia*, 18 (2021) 101175.
